# Supplementary material for: IP6-assisted CSN-COP1 competition regulates a CRL4-ETV5 proteolytic checkpoint to safeguard glucose-induced insulin secretion
Source: PubMed Central journal article supplement (PMC8080631; doi:10.1038/s41467-021-22941-3), 2021-04-28
Supplement: 41467_2021_22941_MOESM1_ESM.pdf [file 41467_2021_22941_MOESM1_ESM.pdf]

1  
2  
3  
4  
5  
6  
7  
8

## **Supplementary Information**

**IP<sub>6</sub>-assisted CSN-COP1 competition regulates a CRL4-ETV5 proteolytic  
checkpoint to safeguard glucose-induced insulin secretion against  
hyperinsulinemia**

**Lin et al.**

## Supplementary Figure 1

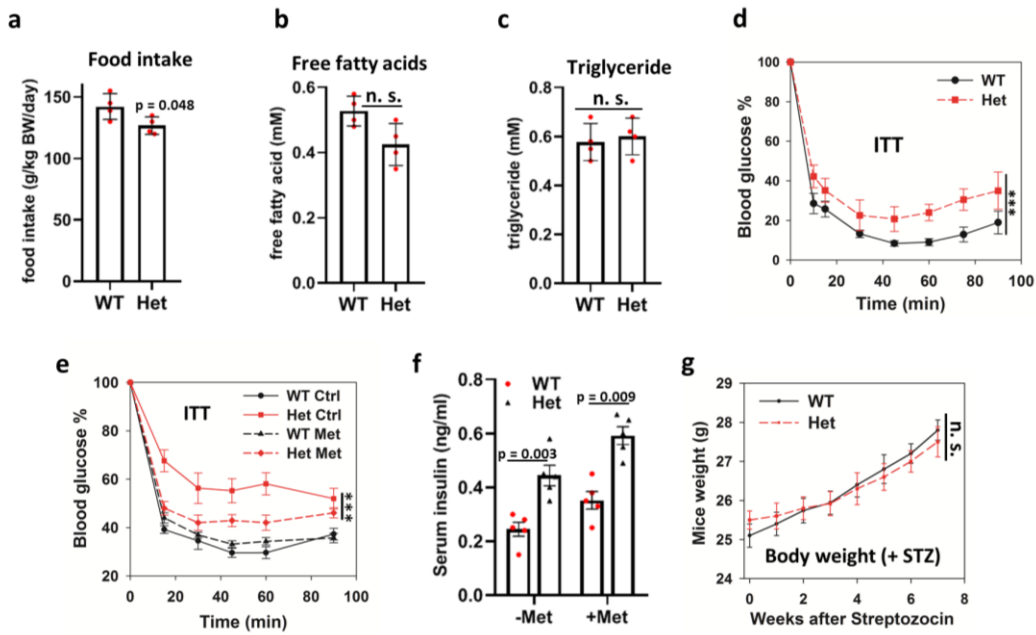

2

3 **Supplementary Fig. 1. Enhanced insulin secretion and congenital**4 **hyperinsulinemia in *Csn2*<sup>WT/K70E</sup> (Het) mice.** (a) Daily food intake of wildtype and5 Het mice (n = 4). Data are presented as Mean  $\pm$  SD. P values were calculated by

6 two-tailed Student's t-test. (b-c) Serum levels of free fatty acids (b) and triglycerides

7 (c) after 6-h fasting (n = 4, n.s.: not significant, student's T test). Data are presented as

8 Mean  $\pm$  SD. (d) Intraperitoneal insulin tolerance test (ITT) of wildtype and Het mice9 at 4 month age (n = 4, \*\*\* $p < 0.001$ , calculated by two way repeated-measures10 ANOVA testing Genotype-x-Time effect). Data are presented as Mean  $\pm$  SD. 100%11 blood glucose means  $9.94 \pm 1.3$  mM for WT, and  $8.3 \pm 1.1$  mM for Het. (e) Effect of12 metformin (Met) treatment on insulin tolerance test of wildtype and *Csn2*<sup>WT/K70E</sup> (Het)13 mice (n = 5, \*\*\* $p < 0.001$ , calculated by two way repeated-measures ANOVA testing14 Treatment-x-Time effect). Data are presented as Mean  $\pm$  SD. 4-month old mice were

15 treated with/without 250 mg/kg Metformin in drinking water for three weeks. 100%

16 blood glucose means  $8.8 \pm 0.7$  mM for WT without Metformin treatment,  $8.4 \pm 0.8$ 17 mM for WT with Metformin treatment,  $9.2 \pm 0.9$  mM for Het without Metformin18 treatment, and  $7.6 \pm 0.9$  mM for Het with Metformin treatment. (f) Effect of19 metformin (Met) treatment on serum insulin levels of wildtype and *Csn2*<sup>WT/K70E</sup> (Het)20 mice (n = 5). Data are presented as Mean  $\pm$  SEM. P values were calculated by

21 two-tailed Student's t-test. (g) Effect of streptozocin (STZ) treatment (i.p., 50 mg/kg

22 for four days) on the body weight of wildtype and *Csn2*<sup>WT/K70E</sup> (Het) mice (n = 4, n.s.:

23 not significant, calculated by two way ANOVA testing genotype main effect). Data

24 are presented as Mean  $\pm$  SEM.

25

26

27

28

29

30

31

1

## Supplementary Figure 2

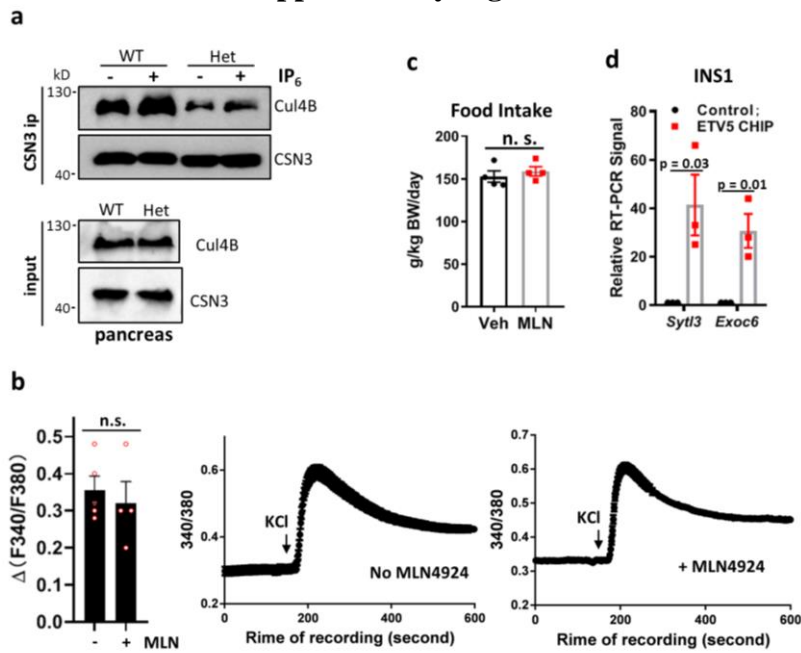

2

3 **Supplementary Fig. 2. Activation of the CRL4<sup>COP1</sup>-ETV5 degradation axis**  
 4 **underlies glucose-induced insulin secretion and is constitutively augmented in**

5 ***Csn2*<sup>WT/K70E</sup> (Het) mice. (a)** Effect of IP<sub>6</sub> (20 μM) addition to pancreatic lysate on  
 6 CSN3-Cul4B co-immunoprecipitation from wildtype and *Csn2*<sup>WT/K70E</sup> pancreas. **(b)**

7 Effect of MLN4924 on average islet cytoplasmic Ca<sup>2+</sup> responses to depolarization  
 8 induced by 25mM KCl, assayed with Fura2AM [n = 4 (WT), or 5 (Het), n.s.: not

9 significant, student's T test]. Data are presented as Mean ± SEM. **(c)** Daily food intake  
 10 of mice is not affected by MLN4924 treatment (n = 4, n.s.: not significant, student's T

11 test). Data are presented as Mean ± SEM. P values were calculated by two-tailed  
 12 Student's t-test. **(d)** ETV5 ChIP on Syt13 and Exoc6 promoters (n = 3). Data are

13 presented as Mean ± SEM. P values were calculated by two-tailed Student's t-test.

14

1  
2  
3

Supplementary Figure 3

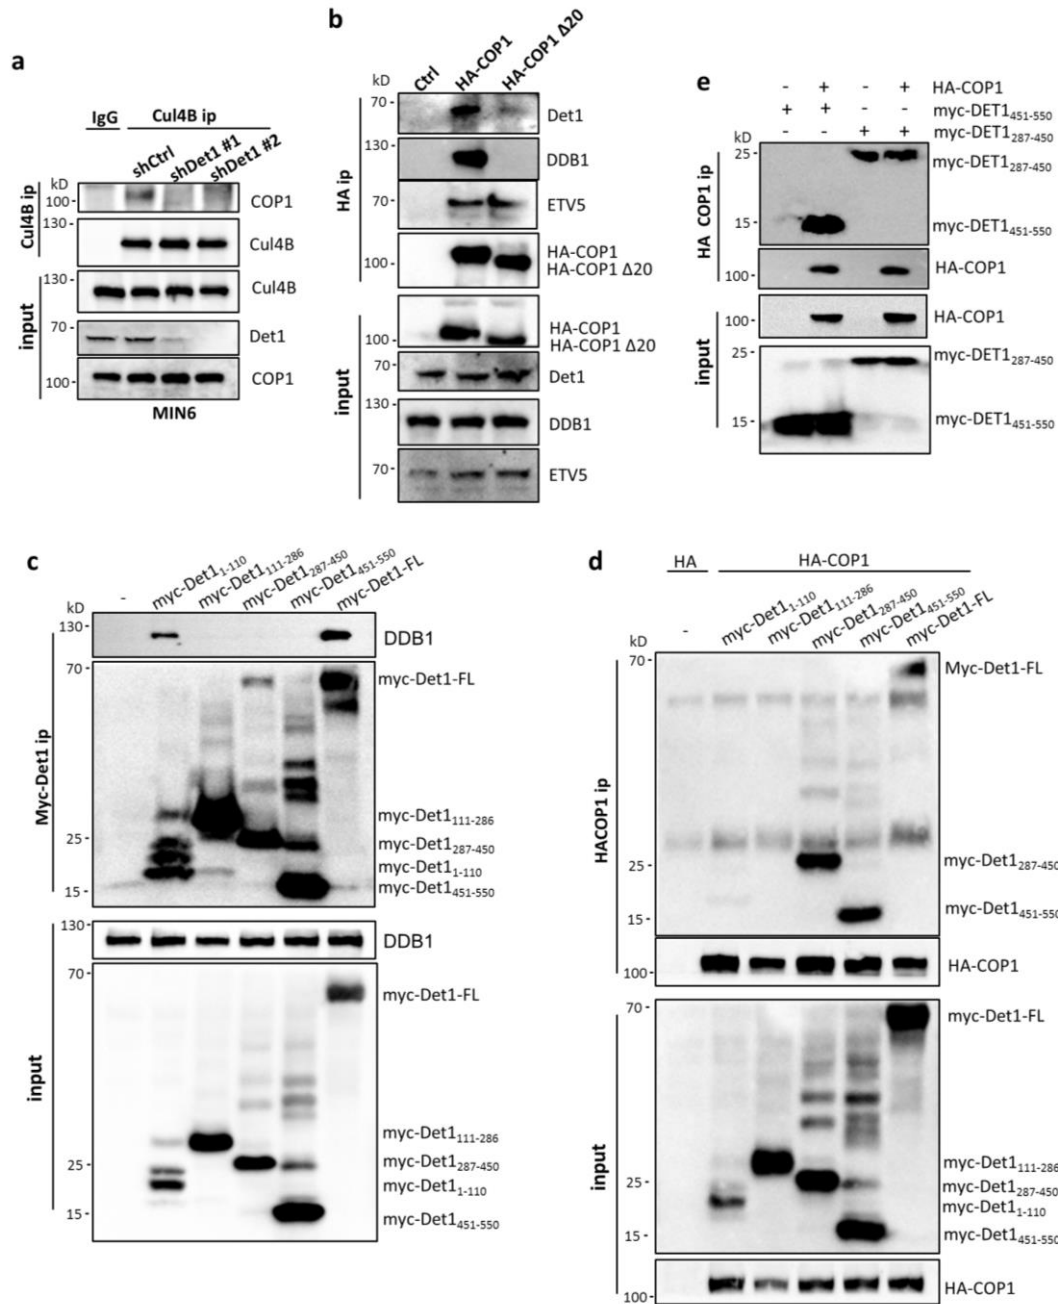

4  
5  
6  
7  
8  
9  
10  
11

**Supplementary Fig. 3. Interaction domain characterization within the CRL4<sup>COP1</sup> complex. (a)** DET1 knockdown abolishes Cul4B immunoprecipitation of COP1. **(b)** Deleting COP1 aa 277-296 ( $\Delta$ 20) abolishes COP1 interaction with DET1 and DDB1, but not ETV5. **(c)** DET1 Fragment mapping experiments showing that DET1 aa 1-110 binds to DDB1. **(d-e)** Reciprocal co-immunoprecipitation experiments showing that DET1 aa 451-500 specifically interacts with COP1.

1  
2

### Supplementary Figure 4

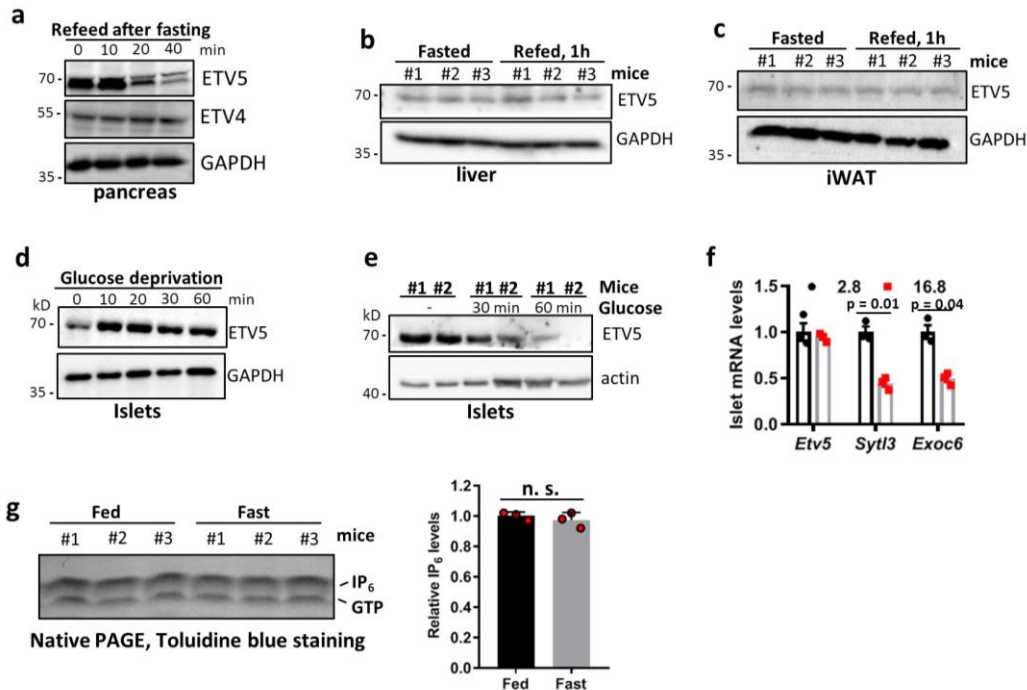

3

4 **Supplementary Fig. 4. ETV5 as a CRL4<sup>COP1</sup> regulated physiologic checkpoint for**  
5 **nutrient/glucose-induced insulin secretion.** (a) Levels of ETV5 in the pancreas of  
6 overnight-fasted mice, with/without refeeding for the indicated time periods. (b-c)  
7 Refeeding does not significantly change Levels of ETV5 in the liver (b) and adipose  
8 tissue (c) of fasted mice. (d) Levels of ETV5 in isolated islets cultured in RPMI  
9 mediated containing 11 mM glucose, followed by glucose withdrawal at the indicated  
10 time points. (e) Levels of ETV5 in isolated islets after exposure to 16.8 mM glucose  
11 at the indicated time points. (f) Transcript levels of *Etv5* and its targets in islets  
12 incubated with 2.8 mM or 11.8 mM glucose (n = 3). Data are presented as Mean ±  
13 SEM. P values were calculated by two-tailed Student's t-test. (g) Total levels of  
14 cellular IP<sub>6</sub> in the pancreas of mice with/without fasting (6h) (n = 3, n.s.: not  
15 significant, student's T test). Data are presented as Mean ± SD.

16

17

18

1

## Supplementary Figure 5

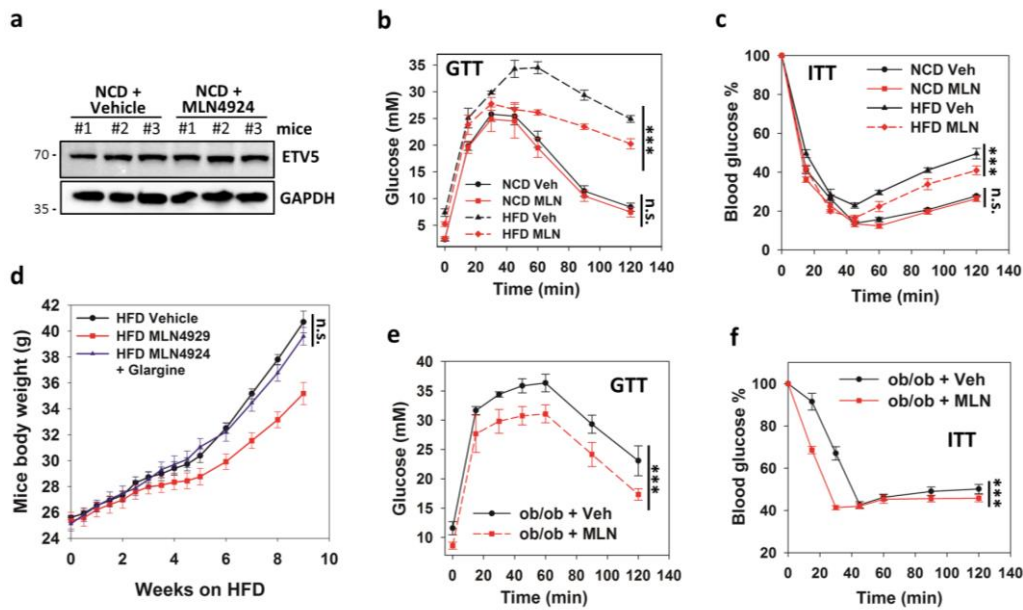

2

3 **Supplementary Fig. 5. The CRL inhibitor Pevonedistat/MLN4924 stabilizes**  
 4 **ETV5 and improves diet-induced or leptin deficiency-induced obesity/diabetes.**  
 5 (a) Effect of MLN4924 injection (i.p. 15 mg/kg) on ETV5 levels from mice fed with  
 6 NCD. (b-c) Glucose (b) and insulin (c) tolerance test in HFD or NCD mice  
 7 with/without MLN4924 treatment (n = 5, \*\*\* $p < 0.001$ , calculated by two way  
 8 repeated-measures ANOVA testing Treatment-x-Time effect). 100% blood glucose  
 9 means  $16.3 \pm 2.2$  mM for WT and  $12.2 \pm 1.4$  mM for Het. 100% blood glucose means  
 10  $7.2 \pm 0.6$  mM for NCD without MLN4924,  $7.4 \pm 0.5$  mM for HFD with MLN4924,  
 11  $9.8 \pm 1.4$  mM for HFD without MLN4924, and  $7.6 \pm 0.5$  mM for HFD with  
 12 MLN4924. (d) Concurrent treatment with Glargine (Sanofi, 50 IU/Kg, twice weekly),  
 13 a slow-releasing insulin, reverses the anti-obese effect of MLN4924 (n = 5, n.s.: not  
 14 significant, two way repeated-measures ANOVA testing Treatment-x-Time effect).  
 15 Data are presented as Mean  $\pm$  SD. Note that (e-f) Glucose (e) and insulin (f) tolerance  
 16 test in ob/ob mice with/without MLN4924 treatment (n = 5, \*\*\* $p < 0.001$ , calculated  
 17 by two way repeated-measures ANOVA testing Treatment-x-Time effect). Data are  
 18 presented as Mean  $\pm$  SEM. 100% blood glucose means  $16.3 \pm 2.2$  mM for ob/ob mice  
 19 without MLN4924 treatment and  $12.2 \pm 1.4$  mM for ob/ob mice with MLN4924  
 20 treatment.

21

1 **Supplementary Table 1. Primer information**

| Primers                                            | Primer sequences                                 |
|----------------------------------------------------|--------------------------------------------------|
| <b>A. Primers to generate different constructs</b> |                                                  |
| hCOP1-shRNA1                                       | GCTAACAGTCAGGGTACAATT                            |
| hCOP1-shRNA2                                       | GCTGGAGTTACAAAGAAGATT                            |
| hETV5-shRNA1                                       | GAGCGATACGTCTACAAATTT                            |
| hETV5-shRNA2                                       | TCCATGGCTTTCCCGGATAAC                            |
| mCOP1-shRNA1                                       | GCTGTATCAGTTGGAGTAGTT                            |
| mCOP1-shRNA2                                       | CCTTGGTATAACAGCACATTA                            |
| mDet1-shRNA1                                       | ATCAAGGGCTCTACTTGTATA                            |
| mDet1-shRNA2                                       | TCCTTGTTTCTTACGGAAATT                            |
| mEtv5-shRNA1                                       | GCCAAAGATGATGCCTGAA                              |
| mEtv5-shRNA2                                       | GCCATGAAGGATTCCCGTA                              |
| hSyt13-ECOR1-F                                     | CTCGAGCTCAAGCTTCGAATTCATGGCCCAAGAAA<br>TAGATC    |
| hSyt13-BamH1-R                                     | CGTCGTCGTCCTTGTAGTCGGATCCTCAGTGCAGG<br>ACAAGAGTC |
| hExoc6-ECOR1-F                                     | CTCGAGCTCAAGCTTCGAATTCATGGCGGAGAACA<br>GCGAGA    |
| hExoc6-BamH1-R                                     | CGTCGTCGTCCTTGTAGTCGGATCCCTACATGTGCT<br>GGGACATA |
| hDET1-F                                            | AAAAGTCGACcATGGATCATCATGTTTCTACCA                |
| hDET1-R                                            | AAAAGCGGCCCGCCTACGTGCAGCAGTGTCGCATAT             |
| hDet1-1-110-F                                      | GCGGAATTCGGTTCGACCATGGAT                         |
| hDet1-1-110-R                                      | GCGGCGGCCGCCTAGTCATTGCCATTGGACAGGA               |
| hDet1-111-286-F                                    | GCGGAATTCGGTTCGACCCAGCGGTCAGTGAATATC<br>C        |
| hDet1-111-286-R                                    | GCGGCGGCCGCCTAGGGATTGGCCATGCCT                   |
| hDet1-287-450-F                                    | GCGGAATTCGGTTCGACCTTAGGGATCCTTTCATC<br>AATTCC    |
| hDet1-287-450-R                                    | GCGGCGGCCGCCTAGATGGGGAGCTGACCC                   |
| hDet1-451-550-F                                    | GCGGAATTCGGTTCGACCAGTGCTCAGTCTTACAGC<br>G        |
| Det1-451-550-R                                     | GCGGCGGCCGCCTACGTG                               |
| mDcaf8-shRNA                                       | GCCATACTGGTTGTGTCAATA                            |
| mWdr59-shRNA                                       | CTCCCTAGTGATTGCCTTCTT                            |
| mWdr51-shRNA                                       | CCAGGTCTAATTGCAGTAATA                            |
| mWdr61-shRNA                                       | GATGCCTGGACTTTGGCATT                             |
| mWdr57-shRNA                                       | GCAGGATTTGACTAATA                                |
| mDcaf5-shRNA                                       | GAGGAAATGATGAGCAAGTTA                            |
| mDcaf9-shRNA                                       | CTTACAAGCAACGGCCATATA                            |
| mDcaf14-shRNA                                      | GGAGTCAAAGTTCGATCTTAT                            |
| mDcaf16-shRNA                                      | CTCTAAATGGAGCACTGCAAT                            |

|                          |                         |
|--------------------------|-------------------------|
| mDcaf10-shRNA            | TGATACCAACAATAGCACTATG  |
| mDcaf2-shRNA             | TGATGAAGCTGCCTACATTTG   |
| mDcaf11-shRNA            | GAGCGGCCACATTGTTAAGAA   |
| mDcaf4-shRNA             | CTTCTCCAGTTATTGCCGTTT   |
| mDcaf7-shRNA             | CAACAACAAGA ACTCAGACTT  |
| mDcaf19-shRNA            | GCAGCATATTTATATGGGATA   |
| mDcaf1-shRNA             | TGCAATTGGAAGACCTATTAT   |
| mWdr12-shRNA             | CCTACAGATGAAGAAGATGAA   |
| mDcaf13-shRNA            | CCCTGTTGAGACATTTCTCTT   |
| mWdr39-shRNA             | GCTGGAAATGTATCTGCACTT   |
| mFbxw5-shRNA             | GCGGCTCTTTAAGATCCAGAA   |
| mRbbp4-shRNA             | ATTTGGGACACTCGTTCAAAC   |
| mWsb2-shRNA              | CAATGGTCTTTGCTGCACGTT   |
| mTtrpc4ap-shRNA          | CTGATGAAGTTCAACGTCGAT   |
| mEed-shRNA               | TCTTGCTAGTAAGGGCACATA   |
| mDdb2-shRNA              | ATACCCAGATCCTAATCTTAA   |
| mCsa-shRNA               | GAGTTAAACAAGACAGGGAT    |
| mSMU1-shRNA              | CCCATGATTATGTAAAGCAA    |
| mWsb1-shRNA              | ACATGAGCTGCTGCTATATAT   |
| mRbbp7-shRNA             | CCTTTGATTCAACTGTCATTT   |
| mDda1-shRNA              | CTGCACCAGCAATGGGATAAA   |
| mCrbn-shRNA              | CCTACCAAGTTCAAGAGCATA   |
| mDcaf17-shRNA            | GAATCTGACTGGATCTATTTC   |
| mWdr75-shRNA             | CGAAGTCACAGAGCTTATTA    |
| <b>B: RT-PCR Primers</b> |                         |
| rSyt13-F                 | ATCCTGCACTGAGGTGAAGC    |
| rSyt13-R                 | AGGCTCCCCGACAGTAATCT    |
| rExoc6-F                 | AGATCGAAAGCACGGACACC    |
| rExoc6-R                 | TCTCCTTGTCATGGTTGCGG    |
| hETV5-F                  | TAGGCTAAGTTGGGGAGGCT    |
| hETV5-R                  | GGGTGGTTCCCAAGAGTAGC    |
| rIns1-F                  | CCAAGTCCCGTCGTGAAGT     |
| rIns1-R                  | GGTGCAGCACTGATCCACAA    |
| rGapdh-F                 | ATGACTCTACCCACGGCAAG    |
| rGapdh-R                 | GGAAGATGGTGATGGGTTTC    |
| mIns1-F                  | CACTTCTACCCCTGCTGG      |
| mIns1-R                  | ACCACAAAGATGCTGTTTGACA  |
| mIns2-F                  | GCTTCTTCTACACACCCATGTC  |
| mIns2-R                  | AGCACTGATCTACAATGCCAC   |
| mSyt13-F                 | AGCTCCTGCAATCTTATCAGAGG |
| mSyt13-R                 | GCCAAGTTCCTGTAACCTGC    |



|           |                         |
|-----------|-------------------------|
| mExoc6-F  | GAAAAGCTAGACGCTTGTATCCG |
| m Exoc6-R | TGAGGAGTTCCGTAATCGCAT   |
| mGapdh-F  | TCAAGAAGGTGGTGAAGCAG    |
| mGapdh-R  | AGGTGGAAGAGTGGGAGTTG    |

1
